# Supplementary material
Source: Springer Nature journal article supplement (https://www.springermedizin.de/resource/supplementary/12891_2012_1829_MOESM2_ESM.pdf/9508534)

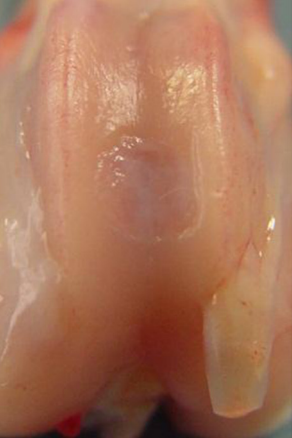

Group I

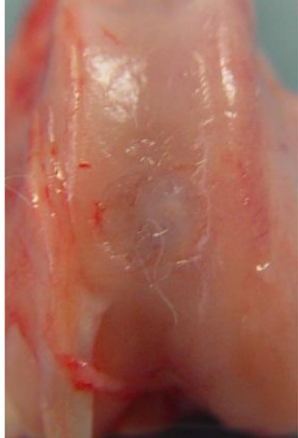

Group II

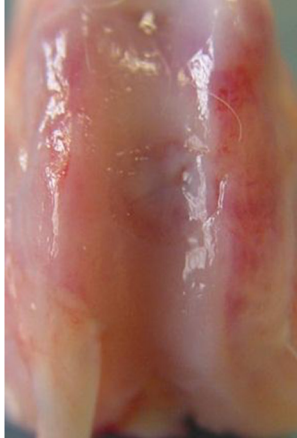

Group III

Supplement: MOESM2 [file 9508534]
